# Supplementary material
Source: HighWire-hosted journal article supplement (http://ajnr-stage2.highwire.org/highwire/filestream/87986/field_highwire_adjunct_files/0/1110.pdf)

**Table A. Summary of included studies**

| Study, Year and Design                                  | FD type and number | Patients | Aneurysms | Age (mean) | Females (%) | Ruptured Aneurysms (%) | Posterior Circulation Aneurysms (%) | Sac size (mean, mm) | Follow up (mean, months) | Coil assisted (%) | Balloon angioplasty (%) | Technical success (%) | Mortality (%) | Morbidity (%) | Ischaemic event rate (%) | Serious ischaemic event rate (%) | Aneurysm occlusion at 6 months (%) | Aneurysm occlusion at 12 months (%) | Study quality by NIH tool |
|---------------------------------------------------------|--------------------|----------|-----------|------------|-------------|------------------------|-------------------------------------|---------------------|--------------------------|-------------------|-------------------------|-----------------------|---------------|---------------|--------------------------|----------------------------------|------------------------------------|-------------------------------------|---------------------------|
| Daglioglu et al. [15]<br>2020<br>Retrospective          | DED<br>180         | 146      | 182       | 51.5       | 65.8        | 25.3                   | 6.6                                 | 8.3                 | 7.0                      | 21.4              | NA                      | 98.9                  | 2.7           | 5.5           | 4.1                      | 4.1                              | 78.8                               | NA                                  | Fair                      |
| Goertz et al. [16-19]<br>2019<br>Retrospective          | DED<br>63          | 59       | 59        | 52.6       | 81.4        | 16.9                   | 15.3                                | 8.1                 | 12.0                     | 20.3              | 10.2                    | 100                   | 0             | 10.2          | 8.5                      | 1.7                              | 70.5                               | 82.8                                | Fair                      |
| Akgul et al. [23]<br>2016<br>Retrospective              | DED<br>26          | 24       | 34        | 51.4       | 58.3        | 2.9                    | 8.8                                 | 9.5                 | 7.4                      | 47.1              | 26.5                    | 100                   | 4.2           | 8.4           | 29.2                     | 4.2                              | 77.8                               | NA                                  | Good                      |
| Trivelato et al. [21]<br>2019<br>Prospective            | DED<br>186         | 146      | 183       | 55.3       | 82.9        | 3.3                    | 9.3                                 | 6.7                 | 9.1                      | 6.0               | 16.9                    | 100                   | 1.4           | 6.2           | 5.5                      | 2.1                              | 80.7                               | 89.2                                | Good                      |
| Martinez-Galdamez et al. [13-14]<br>2019<br>Prospective | SPED<br>54         | 50       | 50        | 53         | 82.0        | 0.0                    | 6.0                                 | 7.7                 | 12.0                     | 14.0              | 18.0                    | 98.1                  | 0.0           | 10.0          | 6.0                      | 0.0                              | 76.3                               | 81.8                                | Good                      |
| SCOPE AUS [20]<br>2019<br>Retrospective                 | SPED<br>344        | 294      | 318       | NA         | 72.4        | 6.7                    | 10.4                                | 7.5                 | 5.6                      | NA                | NA                      | 98.3                  | 1.4           | 5.8           | 10.2                     | 1.4                              | 90.0                               | NA                                  | Good                      |
| Trivelato et al. [22]<br>2019<br>Prospective            | SPED<br>188        | 151      | 182       | 52.7       | 79.5        | 3.8                    | 6.6                                 | 7.0                 | 5.0                      | 12.9              | 9.9                     | 100                   | 0.7           | 6.0           | 4.6                      | 4.0                              | 79.7                               | 85.3                                | Good                      |
| Atasoy et al. [24]<br>2019<br>Retrospective             | SPED<br>45         | 41       | 52        | 56         | 68.3        | 0.0                    | 11.5                                | 9.0                 | 17.2                     | NA                | NA                      | 97.8                  | 2.4           | 4.9           | 2.4                      | 0.00                             | 78.8                               | 82.7                                | Good                      |

**Table B.** Current and previous meta-analyses on flow diverters treating cerebral aneurysms

|                                                  | Examining all types of aneurysms         |                                          |                                          |                                |                                                           | Examining a specific type of aneurysm |                                |                                   |                                                       |                                                                          |                                                                     |
|--------------------------------------------------|------------------------------------------|------------------------------------------|------------------------------------------|--------------------------------|-----------------------------------------------------------|---------------------------------------|--------------------------------|-----------------------------------|-------------------------------------------------------|--------------------------------------------------------------------------|---------------------------------------------------------------------|
| Meta-analysis<br>Year                            | Li<br>2020                               | Brinjikji <sup>4</sup><br>2013           | Briganti <sup>5</sup><br>2015            | Ye <sup>6</sup><br>2016        | Zhou <sup>3</sup><br>2017                                 | Cagnazzo <sup>31</sup><br>2018        | Cagnazzo <sup>30</sup><br>2018 | Zhu <sup>32</sup><br>2018         | Kiyofuji <sup>33</sup><br>2018                        | Bhatia <sup>28</sup><br>2019                                             | Fiorella <sup>27</sup><br>2020                                      |
| <b>Flow diverters</b>                            | SPED, DED                                | PED, SILK                                | PED, SILK,<br>SURPASS                    | PED, SILK,<br>FRED,<br>SURPASS | PED, FPED,<br>SILK, FRED,<br>SURPASS,<br>Tubridge,<br>WEB | PED, SILK,<br>FRED,<br>SURPASS        | /                              | PED, SILK,<br>FRED,<br>Enterprise | /                                                     | FPED                                                                     | PED,<br>SURPASS,<br>DED, FRED,<br>SPED, SILK                        |
| <b>Comments</b>                                  | Surface<br>modified<br>flow<br>diverters | Early data on<br>older flow<br>diverters | Early data on<br>older flow<br>diverters | Large<br>number of<br>subjects | Focused on<br>complications                               | Acutely<br>ruptured<br>aneurysms      | Giant<br>aneurysms             | Blister like<br>aneurysms         | Non-saccular<br>posterior<br>circulation<br>aneurysms | Peri-<br>operative<br>outcomes of<br>FPED for<br>unruptured<br>aneurysms | Unruptured<br>small/<br>medium-<br>sized<br>aneurysms of<br>the ICA |
| <b>Patients/<br/>Aneurysms</b>                   | 911/1060                                 | 1451/1654                                | 1483/1704                                | 2508/2826                      | 3125/3427                                                 | 20/223                                | /                              | -/165                             | 129/131                                               | 879/901                                                                  | 2614/-                                                              |
| <b>Follow Up Length<br/>(Months)</b>             | 8.36                                     | /                                        | 9                                        | 6.3                            | /                                                         | 9.6                                   | 26                             | 3-24                              | 11.25                                                 | 1                                                                        | /                                                                   |
| <b>Technical<br/>Success (%)</b>                 | 99.6                                     | /                                        | 91.7                                     | /                              | 90.6                                                      | /                                     | /                              | 100                               | /                                                     | 99.3                                                                     | /                                                                   |
| <b>Aneurysm<br/>Occlusion<br/>(6 months, %)</b>  | 80.5                                     | 76                                       | 74.5                                     | 77.9                           | /                                                         | 88.9<br>(9.6 months)                  | /                              | 72<br>(on last FU)                | /                                                     | /                                                                        | /                                                                   |
| <b>Aneurysm<br/>Occlusion<br/>(12 months, %)</b> | 85.6                                     | /                                        | 89.6                                     | /                              | /                                                         | /                                     | 72                             | /                                 | 52                                                    | /                                                                        | 74.6%                                                               |
| <b>Mortality Rate<br/>(%)</b>                    | 0.7                                      | 4                                        | 3.4                                      | 3.8                            | 2.8                                                       | 4.5                                   | 9%<br>(grouped)                | 3                                 | 21                                                    | 0.8                                                                      | /                                                                   |
| <b>Morbidity Rate<br/>(%)</b>                    | 6.0                                      | 5<br>(permanent)                         | 3.5<br>(permanent)                       | /                              | 17<br>(overall)<br>3.7<br>(permanent)                     | 17.8                                  | 15                             | 26                                | 26                                                    | 10.1                                                                     | 7.8%                                                                |
| <b>Total Ischaemia<br/>Rate (%)</b>              | 6.7                                      | /                                        | /                                        | 9.8                            | /                                                         | /                                     | 30                             | /                                 | 23                                                    | /                                                                        | /                                                                   |
| <b>Serious<br/>Ischaemia Rate<br/>(%)</b>        | 1.8                                      | 6                                        | 4.1                                      | 5.5                            | 7.5                                                       | 8                                     | /                              | 12                                | /                                                     | 0.6                                                                      | /                                                                   |

## Appendix 1: PRISMA flowchart, detailed search method and results

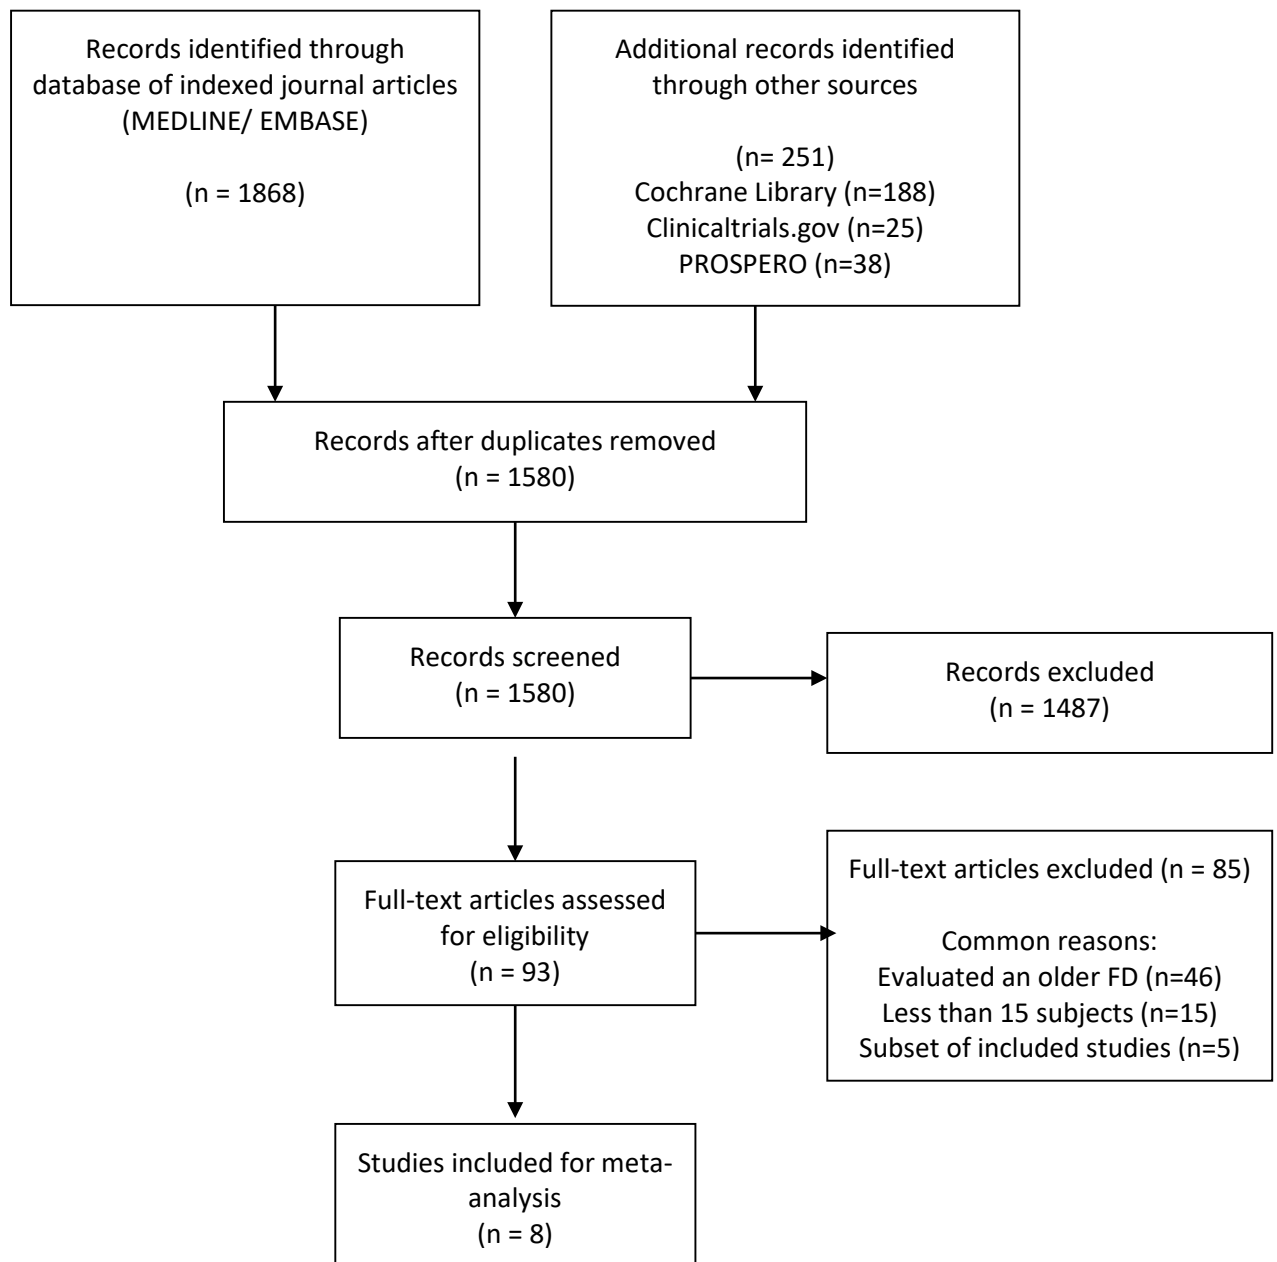

**PRISMA Flowchart**

## **Search Strategy**

### **1. MEDLINE & EMBASE**

**Search date:**

26<sup>th</sup> December 2019

**Search Engine:**

OvidSP

**Databases:**

Embase 1974 to present

Medline (Ovid MEDLINE® Epub Ahead of Print, In-Process & Other Non-Indexed Citations, Ovid MEDLINE® Daily and Ovid MEDLINE®) 1946 to present

**Parameters:**

Advanced Search

Search keywords are for 'All fields'

CheckTag: "Human"

Age Group: All

Publication Year: 2014 – 2020 (to include preprints)

No limit in language

**Search Keywords**

"Intracranial Aneurysm"

"Cerebral Aneurysm"

"Brain aneurysm"

"Flow diver\*"

"Derivo"

"DED"

"Pipeline shield"

"SPED"

"PED"

"P64"

"p48"

## Search Syntax:

1. "Intracranial aneurysm".mp. [mp=tx, bt, ti, ab, ct, bo, hw, tn, ot, dm, mf, dv, kw, fx, dq, nm, kf, ox, px, rx, ui, sy]
2. limit 1 to humans
3. limit 2 to yr="2014 -2020"
4. cerebral aneurysm.mp. [mp=tx, bt, ti, ab, ct, bo, hw, tn, ot, dm, mf, dv, kw, fx, dq, nm, kf, ox, px, rx, ui, sy]
5. limit 3 to humans
6. limit 5 to yr="2014 -2020"
7. brain aneurysm.mp. [mp=tx, bt, ti, ab, ct, bo, hw, tn, ot, dm, mf, dv, kw, fx, dq, nm, kf, ox, px, rx, ui, sy]
8. limit 7 to humans
9. limit 8 to yr="2014 -2020"
- 10.3 or 6 or 9
- 11.flow diver\*.mp. [mp=tx, bt, ti, ab, ct, bo, hw, tn, ot, dm, mf, dv, kw, fx, dq, nm, kf, ox, px, rx, ui, sy]
- 12.limit 11 to humans
- 13.limit 12 to yr="2014 -2020"
- 14.(Derivo or DED).mp. [mp=tx, bt, ti, ab, ct, bo, hw, tn, ot, dm, mf, dv, kw, fx, dq, nm, kf, ox, px, rx, ui, sy]
- 15.limit 14 to humans
- 16.limit 15 to yr="2014-2020"
- 17.("Pipeline" or "SPED" or "PED").mp. [mp=tx, bt, ti, ab, ct, bo, hw, tn, ot, dm, mf, dv, kw, fx, dq, nm, kf, ox, px, rx, ui, sy]
- 18.limit 17 to humans
- 19.limit 18 to yr="2014 -2020"
- 20.p64.mp. [mp=tx, bt, ti, ab, ct, bo, hw, tn, ot, dm, mf, dv, kw, fx, dq, nm, kf, ox, px, rx, ui, sy]
- 21.limit 20 to humans
- 22.limit 21 to yr="2014 -2020"
- 23.p48mw.mp. [mp=tx, bt, ti, ab, ct, bo, hw, tn, ot, dm, mf, dv, kw, fx, dq, nm, kf, ox, px, rx, ui, sy]
- 24.limit 23 to humans
- 25.limit 24 to yr="2014 - 2020"
- 26.13 or 16 or 19 or 22 or 25
- 27.10 and 26

## Results:

1868 results generated

532 duplicates removed

1336 eligible for title screening

## **2. Cochrane Library search**

### **Search date:**

26<sup>th</sup> December 2019

### **Databases:**

Cochrane Central Register of Controlled Trials (CENTRAL)

Cochrane Database of Systematic Reviews (CDSR)

### **Parameters:**

Advanced search

Search fields: Title Abstract Keyword

### **Search syntax:**

Aneurysm OR flow diver\* OR pipeline OR derive OR P64 OR P48

### **Result:**

188 titles generated.

All screened and 0 found relevant

### **3. Clinicaltrials.gov search**

**Search date:**

26<sup>th</sup> December 2019

**Parameters:**

Advanced search

Under intervention/treatment

**Search syntax and yield:**

Pipeline: 25 results

Derivo: 0

P64: 0

P48: 0

**Results:**

3 records found relevant.

Full text screened and 0 additional study included.

#### **4. PROSPERO**

**Search date:**

26<sup>th</sup> December 2019

**Search syntax and yield:**

**1. Pipeline**

28 titles yielded

4 relevant and 4 proceeded to full text screening

**2. Flow diverter**

6 results yielded

4 duplicates and 2 proceeded to full text screening

**3. Derivo**

1 result yielded - duplicate

**4. P64**

2 results yielded - duplicate

**5. P48**

1 result yielded – irrelevant



## **5. Manufacturer websites**

The following manufacturer website were browsed and no additional eligible study on their products were found.

- Medtronic ([www.medtronic.com](http://www.medtronic.com))
- Acandis ([www.acandis.com](http://www.acandis.com))
- Phenox ([www.phenox.net](http://www.phenox.net))

## **6. Related journal, society and conference websites**

Recent issues and events from the following major interventional neuroradiology journals, organization and conference website were browsed and no additional eligible study were found.

- Interventional Neuroradiology (<https://journals.sagepub.com/home/ine>)
- Journal of Neurointerventional Surgery (<https://jn.is.bmj.com/>)
- Neuroradiology (<https://www.springer.com/journal/234>)
- Clinical neuroradiology (<https://link.springer.com/journal/62>)
- American Journal of Neuroradiology (<https://www.ajnr.org>)
- WFITN (<https://www.wfitn.org>)
- ESMINT (<https://esmint.eu>)
- Society of NeuroInterventional Surgery (<https://snisonline.org>)

## Appendix 2. Risk of bias assessment with NIH tool for Case Series Studies

|                                                     | Daglioglu<br>2019 [15]<br>(DED) | Goertz 2019<br>[16-19]<br>(DED) | Akgul 2019<br>[23]<br>(DED) | Trivelato<br>2019 [21]<br>(DED) | Martinez-<br>Galdamez<br>2019 [13-<br>14](SPED) | SCOPE AUS<br>2019 [20]<br>(SPED) | Trivelato<br>2019 [22]<br>(SPED) | Atasoy 2019<br>[24]<br>(SPED) |
|-----------------------------------------------------|---------------------------------|---------------------------------|-----------------------------|---------------------------------|-------------------------------------------------|----------------------------------|----------------------------------|-------------------------------|
| Clear study question                                | ✓                               | ✓                               | ✓                           | ✓                               | ✓                                               | ✓                                | ✓                                | ✓                             |
| Appropriate study population and<br>case definition | ✓                               | ✓                               | ✓                           | ✓                               | ✓                                               | ✓                                | ✓                                | ✓                             |
| Consecutive cases                                   | NR                              | ✓                               | NR                          | ✓                               | NR                                              | ✓                                | ✓                                | ✓                             |
| Comparable subjects                                 | ✓                               | ✓                               | ✓                           | ✓                               | ✓                                               | ✓                                | ✓                                | ✓                             |
| Clear depiction of intervention                     | ✓                               | ✓                               | ✓                           | ✓                               | ✓                                               | ✓                                | ✓                                | ✓                             |
| Appropriate outcome<br>measurements                 | ✓                               | X                               | ✓                           | ✓                               | ✓                                               | ✓                                | ✓                                | ✓                             |
| Adequate follow up                                  | X                               | X                               | X                           | X                               | ✓                                               | X                                | X                                | ✓                             |
| Sound statistical methods                           | X                               | ✓                               | ✓                           | ✓                               | ✓                                               | ✓                                | ✓                                | ✓                             |
| Good description of results                         | X                               | ✓                               | ✓                           | ✓                               | ✓                                               | ✓                                | ✓                                | ✓                             |
| Overall grading                                     | Fair                            | Fair                            | Good                        | Good                            | Good                                            | Good                             | Good                             | Good                          |

### Appendix 3. Detailed summary of unsuccessful deployments, mortality and morbidity

**Table 1. Summary of technically challenges and unsuccessful deployments**

| Number                              | Study                    | Details                                                                                                                                                                | Solution                                                                                                      |
|-------------------------------------|--------------------------|------------------------------------------------------------------------------------------------------------------------------------------------------------------------|---------------------------------------------------------------------------------------------------------------|
| <b>Unsuccessful deployments (6)</b> |                          |                                                                                                                                                                        |                                                                                                               |
| 1-2 (2)                             | Daglioglu (DED)          | Inability to cannulate the target arterial segment with the DED. Deployment not actually attempted.                                                                    | Not mentioned but commented that Headway 27 and XT 27 microcatheters were most suitable for delivery overall. |
| 3-5 (3)                             | Martinez-Galdamez (SPED) | Commented that 3 SPEDS did not fully deploy and were therefore not implanted                                                                                           | Not mentioned.                                                                                                |
| 6 (1)                               | Atasoy (SPED)            | Unable to deploy SPED in an a patient with a wide neck saccular M1 aneurysm as the SPED would not travel through the Marksman/Navien catheters through a tourtuous ICA | Treated eventually with Balt Baby Leo stent.                                                                  |
| <b>Technical challenges (13)</b>    |                          |                                                                                                                                                                        |                                                                                                               |
| 1 (1)                               | Akgul (DED)              | Fish mouthing of a DED                                                                                                                                                 | Placement of an additional DED                                                                                |
| 2-5 (4)                             | Trivelato (DED)          | Improper proximal DED expansion in 4 cases. Commented that entering the device with a balloon was challenging.                                                         | 2 solved with balloon angioplasty and 2 with device removal and substitution                                  |
| 6-11 (6)                            | SCOPE AUS (SPED)         | Commented to have unsuccessful initial deployments.                                                                                                                    | No further details.                                                                                           |
| 12-13 (2)                           | Trivelato (SPED)         | Improper SPED expansion in 2 cases                                                                                                                                     | No further information.                                                                                       |

**Table 2. Summary of mortality (13)**

| Number  | Study            | Details                                                                                                                                                                                                                                              |
|---------|------------------|------------------------------------------------------------------------------------------------------------------------------------------------------------------------------------------------------------------------------------------------------|
| 1       | Daglioglu (DED)  | Perforation of aneurysm in DED-assisted coiling                                                                                                                                                                                                      |
| 2-4 (3) | Daglioglu (DED)  | Unspecified cause of death. Patient noted to have mRS 6 (exitus) on follow up.                                                                                                                                                                       |
| 5       | Akgul (DED)      | Giant ICA terminus aneurysm treated with DED without coiling, DSA showing stasis. Persistent headache post procedure with CT showing peri-aneurysmal oedema, treated with dexamethasone. Aneurysm ruptured 6 months post procedure and patient died. |
| 6       | Trivelato (DED)  | Incidental paraophthalmic ICA aneurysm treated with DED, thrombosis 4 days afterwards (commented related to self-discontinuation of antiplatelets) and succumbed.                                                                                    |
| 7       | Trivelato (DED)  | Ruptured giant fusiform basilar trunk aneurysm treated with DED, died 5 days postoperatively due to rebleed.                                                                                                                                         |
| 8       | SCOPE AUS (SPED) | MCA aneurysm treated with SPED. Fatal delayed parenchymal haemorrhage.                                                                                                                                                                               |
| 9       | SCOPE AUS (SPED) | Paraclinoid ICA aneurysm treated with SPED. Fatal delayed parenchymal haemorrhage.                                                                                                                                                                   |
| 10      | SCOPE AUS (SPED) | PICA aneurysm treated with SPED. Fatal recurrent subarachnoid haemorrhage.                                                                                                                                                                           |
| 11      | SCOPE AUS (SPED) | Paraclinoid ICA aneurysm treated with SPED. Fatal recurrent subarachnoid haemorrhage.                                                                                                                                                                |
| 12      | Trivelato (SPED) | Unspecified death occurring in the SPED series                                                                                                                                                                                                       |
| 13      | Atasoy (SPED)    | Giant basilar tip aneurysm (27mm), previous coiling with recurrent 10mm sac. Treated with SPED and adjunctive coiling. Developed acute subdural hematoma 15 days post procedure and died.                                                            |

**Table 3. Summary of morbidity and ischaemic complications.**

| Number                                                                   | Event                                   | Details                                                                                                                                                                                                                                                                             | Ischaemia related |
|--------------------------------------------------------------------------|-----------------------------------------|-------------------------------------------------------------------------------------------------------------------------------------------------------------------------------------------------------------------------------------------------------------------------------------|-------------------|
| <b>Daglioglu – DED (8 morbidities, 6 ischaemia, 6 serious ischaemia)</b> |                                         |                                                                                                                                                                                                                                                                                     |                   |
| 1                                                                        | Massive cerebral infarction             | Occlusion of DED. Considered serious ischaemic event.                                                                                                                                                                                                                               | Yes               |
| 2-6 (5)                                                                  | Thromboembolic infarction               | DED placed in 1 MCA, 3 ICA, 1 BA. Commented to be symptomatic with no further information. Considered serious ischaemic event.                                                                                                                                                      | Yes               |
| 7                                                                        | Retroperitoneal haematoma               | Did not require surgical intervention. Considered non-ischaemic morbidity.                                                                                                                                                                                                          | No                |
| 8                                                                        | Small intracranial haemorrhage          | Commented to have no residual symptom and attributed to antiplatelet therapy. Considered non-ischaemic morbidity.                                                                                                                                                                   | No                |
| <b>Goertz - DED (6 morbidities, 5 ischaemia, 1 serious ischaemia)</b>    |                                         |                                                                                                                                                                                                                                                                                     |                   |
| 1                                                                        | Thromboembolic infarction               | Occurred during procedure and treated with IV tirofiban. Discharged with mild motor aphasia (mRS1, NIHSS 1), but was free of symptoms 1 year later. Considered non-serious ischaemic event.                                                                                         | Yes               |
| 2                                                                        | Thromboembolic infarction               | Ruptured ophthalmic ICA aneurysm treated with DED. Right hemiparesis and motor aphasia 4 days post operatively. Instant thrombosis noted treated by thrombectomy. Persistent hemiparesis (mRS1) at 1 year follow up. Considered serious ischaemic event.                            | Yes               |
| 3-5                                                                      | Thromboembolic event                    | No further information provided. Considered ischaemic morbidity.                                                                                                                                                                                                                    | Yes               |
| 6                                                                        | Intracranial haemorrhage                | No further information provided. Considered non-ischaemic morbidity.                                                                                                                                                                                                                | No                |
| <b>Akgul - DED (2 morbidities, 7 ischaemia, 1 serious ischaemia)</b>     |                                         |                                                                                                                                                                                                                                                                                     |                   |
| 1                                                                        | Thromboembolic infarct                  | Right hemiparesis directly after procedure due to a small cortical infarct treated with tirofiban. No residual deficit. Considered non-serious ischaemic morbidity.                                                                                                                 | Yes               |
| 2                                                                        | Ischaemic stroke due to stent occlusion | Right hemiplegia and aphasia 3 days after procedure, found to have stent occlusion and treated with thrombectomy, with mild residual deficit. Later found to have clopidogrel insensitivity and the second APT was switched to ticlopidine. Considered serious ischaemic morbidity. | Yes               |
| 3-7 (5)                                                                  | Thromboembolic infarct                  | Asymptomatic and only seen on DWI MRI. Considered non-serious ischaemic event.                                                                                                                                                                                                      | Yes               |
| <b>Trivelato – DED (9 morbidities, 8 ischaemia, 3 serious ischaemia)</b> |                                         |                                                                                                                                                                                                                                                                                     |                   |
| 1-2 (2)                                                                  | Major ischaemic stroke                  | No further information. Treated as serious ischaemic event.                                                                                                                                                                                                                         | Yes               |
| 3-4 (2)                                                                  | Transient ischaemic attack (TIA)        | No further information. Treated as non-serious ischaemic event.                                                                                                                                                                                                                     | Yes               |
| 5                                                                        | Intracranial haemorrhage                | Commented to be contralateral to aneurysms. No further information. Considered a non-ischaemic morbidity.                                                                                                                                                                           | No                |
| 6                                                                        | Increased mass effect                   | No further information. Considered a non-ischaemic morbidity.                                                                                                                                                                                                                       | No                |
| 7-10 (4)                                                                 | Thromboembolic events in 4 patients     | Occurred during intervention and treated by IA abciximab. Resulted in 1 ischaemic stroke (serious) and 3 asymptomatic patients                                                                                                                                                      | Yes               |

|                                                                                   |                                               |                                                                                                                                                                                                                 |     |
|-----------------------------------------------------------------------------------|-----------------------------------------------|-----------------------------------------------------------------------------------------------------------------------------------------------------------------------------------------------------------------|-----|
| 11                                                                                | Intracranial haemorrhage                      | Due to vessel perforation during exchange maneuverer. Commented to be asymptomatic. Not considered a morbidity.                                                                                                 | No  |
| 12-13 (2)                                                                         | Retroperitoneal haemorrhage in 2 patients     | No further information. Considered non-ischaemic morbidities.                                                                                                                                                   | No  |
| <b>Martinez-Galdamez – SPED (5 morbidities, 3 ischaemia, 0 serious ischaemia)</b> |                                               |                                                                                                                                                                                                                 |     |
| 1                                                                                 | Headache ? due to mass effect                 | Unruptured giant aneurysm (29mm) treated with SPED and readmitted 4 days later for headache with no neurological deficits. Symptoms resolved with medical treatment. Considered a non-ischaemic morbidity.      | No  |
| 2                                                                                 | Thromboembolic infarct                        | Previously ruptured 4.5mm aneurysm treated with SPED. Diplopia 2 days post procedure and imaging showed multifocal infarcts and patent SPED, likely thrombo-embolism. Considered a serious ischaemic morbidity. | Yes |
| 3                                                                                 | Retroperitoneal haematoma                     | High femoral puncture with extravasation and hypotensive shock requiring surgical intervention. No permanent sequelae. Considered a non-ischaemic morbidity.                                                    | No  |
| 4                                                                                 | Left ICA thrombosis with collateral formation | Asymptomatic patient. Noted 63 days post procedure during reassessment DSA. Antiplatelet assay showed suboptimal platelet inhibition. Continued on DAPT. Considered a non-serious ischaemic event.              | Yes |
| 11                                                                                | Carotid dissection                            | Considered non-serious and no further details given. Not considered morbidity.                                                                                                                                  | No  |
| 12                                                                                | Groin haematoma                               | Considered non-serious and no further details given. Considered non-ischaemic morbidity.                                                                                                                        | No  |
| 13                                                                                | Cerebral infarction                           | Considered non-serious and no further details given. Considered ischaemic morbidity.                                                                                                                            | Yes |
| 14-15                                                                             | Nausea in 2 cases                             | Considered non-serious and no further details given. Not considered morbidity as minor symptoms.                                                                                                                | No  |
| <b>SCOPE AUS (17 morbidities, 30 ischaemia, 4 serious ischaemia)</b>              |                                               |                                                                                                                                                                                                                 |     |
| 1                                                                                 | Cerebral infarction                           | Basilar/PCA aneurysm with pontine infarct leaving permanent ischaemic deficit. Considered serious ischaemic morbidity.                                                                                          | Yes |
| 2                                                                                 | Cerebral infarction                           | MCA aneurysm with lenticulostriate infarct leaving permanent ischaemic deficit. Considered serious ischaemic morbidity.                                                                                         | Yes |
| 3                                                                                 | Cerebral infarction                           | MCA aneurysm with distal territory infarct leaving permanent ischaemic deficit. Considered serious ischaemic morbidity.                                                                                         | Yes |
| 4                                                                                 | Cerebral infarction                           | Basilar dissection with PCA territory infarct leaving permanent ischaemic deficit. Considered serious ischaemic morbidity.                                                                                      | Yes |
| 5-17 (13)                                                                         | Transient ischaemic symptoms in 13 cases      | Classified as non-serious ischaemic morbidity.                                                                                                                                                                  | Yes |
| 18-30 (13)                                                                        | MRI showing infarct in 13 patients            | Commented to be asymptomatic. Considered an ischaemic event but not morbidity.                                                                                                                                  | Yes |
| <b>Trivelato – SPED (9 morbidities, 7 ischaemia, 6 serious ischaemia)</b>         |                                               |                                                                                                                                                                                                                 |     |
| 1-2 (2)                                                                           | Ischaemic stroke                              | Commented to be disabling. Classified as serious ischaemic morbidity                                                                                                                                            | Yes |
| 3-5 (3)                                                                           | Minor ischaemic stroke                        | No further information. Classified as serious ischaemic morbidity                                                                                                                                               | Yes |
| 6                                                                                 | TIA                                           | No further information. Classified as non-serious ischaemic morbidity                                                                                                                                           | Yes |
| 7                                                                                 | Cerebral haemorrhage                          | Symptomatic. No further information. Considered a non-ischaemic morbidity.                                                                                                                                      | No  |

|                                                                        |                                              |                                                                                                                                                                                                                                                                                                         |     |
|------------------------------------------------------------------------|----------------------------------------------|---------------------------------------------------------------------------------------------------------------------------------------------------------------------------------------------------------------------------------------------------------------------------------------------------------|-----|
| 8                                                                      | Increase in mass effect                      | Symptomatic. No further information. Considered a non-ischaemic morbidity.                                                                                                                                                                                                                              | No  |
| 9                                                                      | Retinal ischaemia                            | Symptomatic. No further information. Classified as serious ischaemic morbidity                                                                                                                                                                                                                          | Yes |
| 10-13 (4)                                                              | Dissection of cervical vessels in 4 patients | No further information. Assumed as asymptomatic as they were considered to have reached the primary safety endpoint in study. Not considered morbidity.                                                                                                                                                 | No  |
| 14-16 (3)                                                              | Thromboembolism in 3 cases                   | No further information. Assumed as asymptomatic as they were considered to have reached the primary safety endpoint in study. Considered non-serious ischaemic events.                                                                                                                                  | Yes |
| 17-18 (2)                                                              | Vessel perforation in 2 cases                | No further information. Assumed as asymptomatic as they were considered to have reached the primary safety endpoint in study. Not considered morbidity.                                                                                                                                                 | No  |
| <b>Atasoy – SPED (2 morbidities, 1 ischaemia, 0 serious ischaemia)</b> |                                              |                                                                                                                                                                                                                                                                                                         |     |
| 1                                                                      | Intracranial haemorrhage with headache       | Giant right cavernous ICA aneurysm (28mm) treated with 2 SPEDs. Developed 3 <sup>rd</sup> nerve palsy day 7 post procedure with CT showing thrombosed aneurysm and small remote ICH. Headache resolved. No further details regarding 3 <sup>rd</sup> nerve palsy. Considered a non-ischaemic morbidity. | No  |
| 2                                                                      | TIA                                          | Temporary left sided facial droop and slurred speech 6 days after right ICA SPED deployment. CT, MR and MRA were normal. Also known to have atrial fibrillation. Considered non-serious ischaemic morbidity.                                                                                            | Yes |

## Appendix 4. Forest Plots of 7 meta-analyzed outcomes

### Efficacy outcome 1: Technical Success Rate

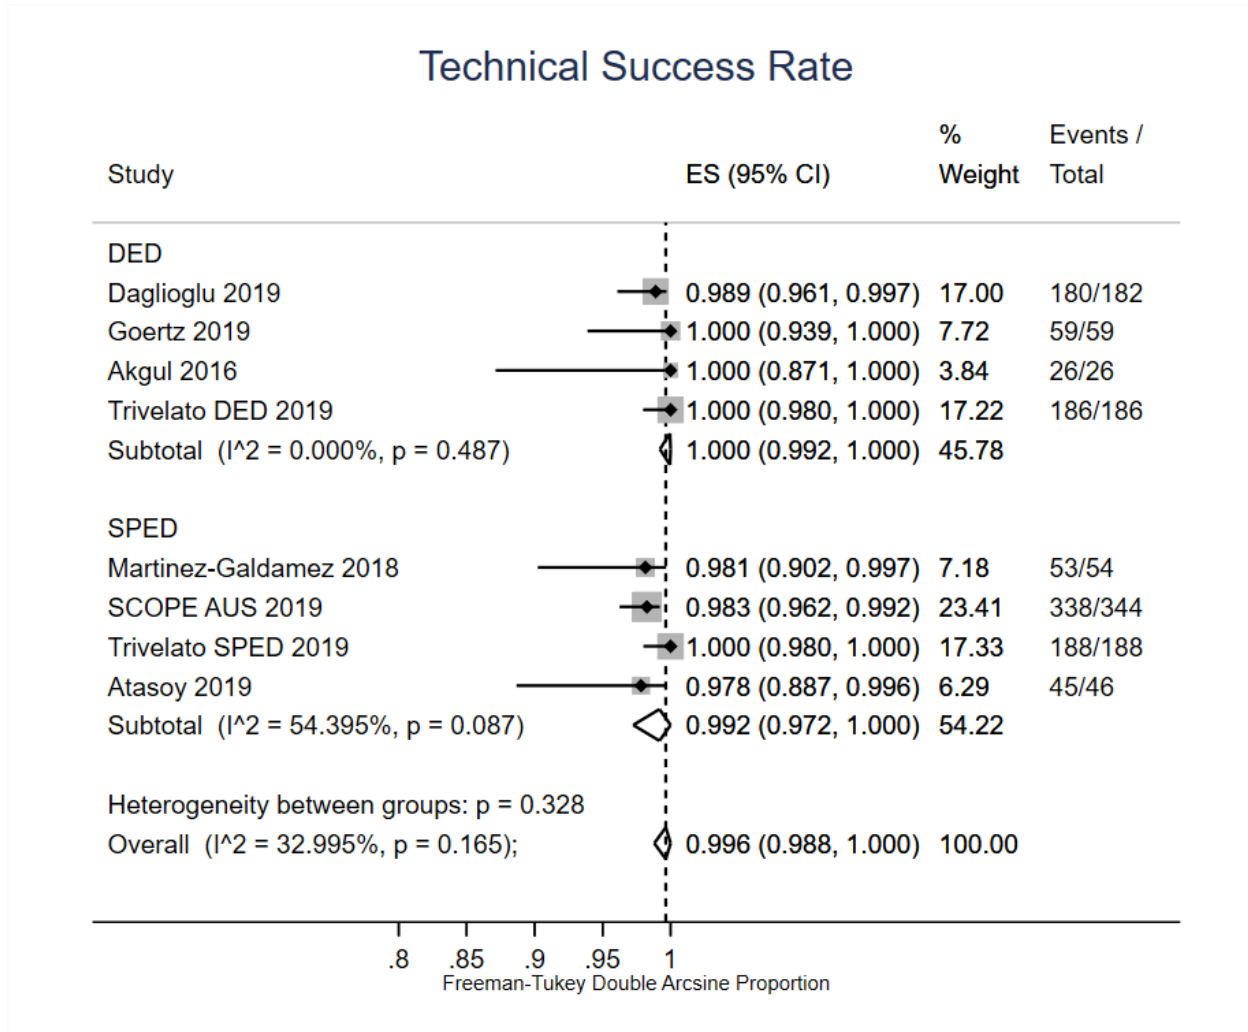

## Efficacy outcome 2: 6 Month Aneurysm Occlusion Rate

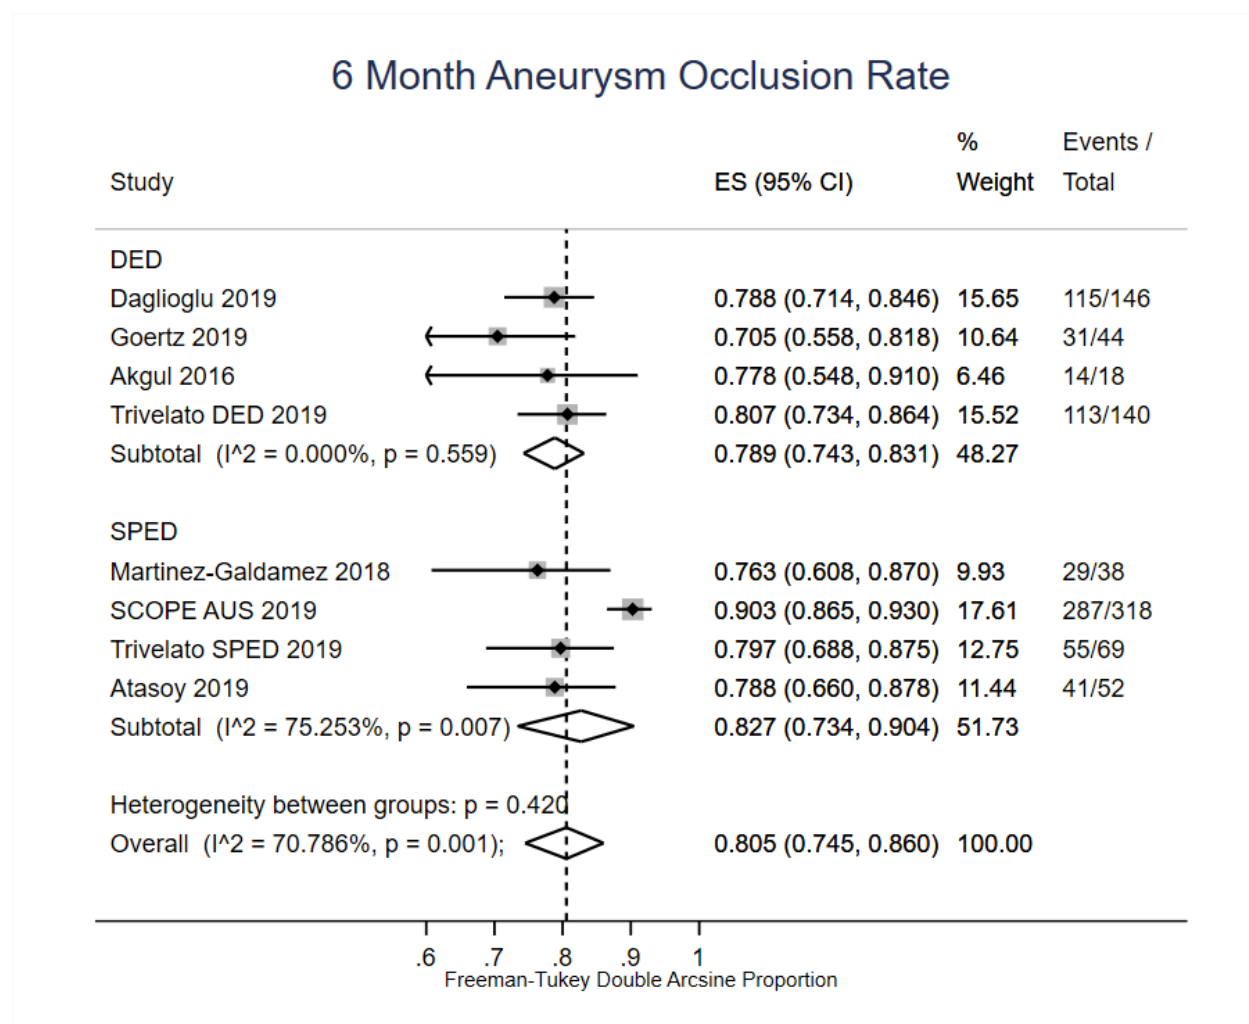



### Efficacy outcome 3: 1 Year Aneurysm Occlusion Rate

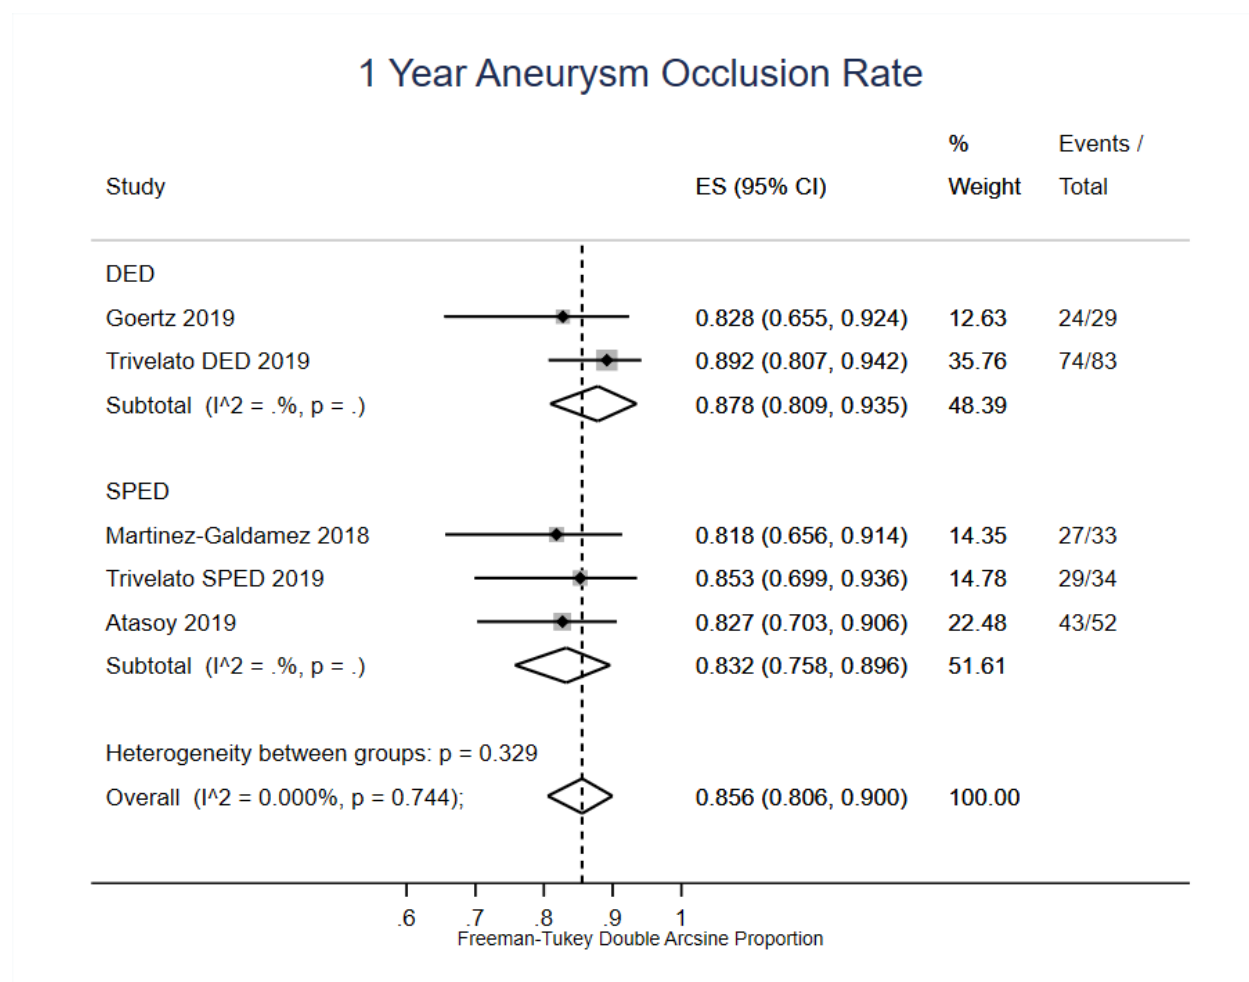

## Safety outcome 1: Mortality Rate

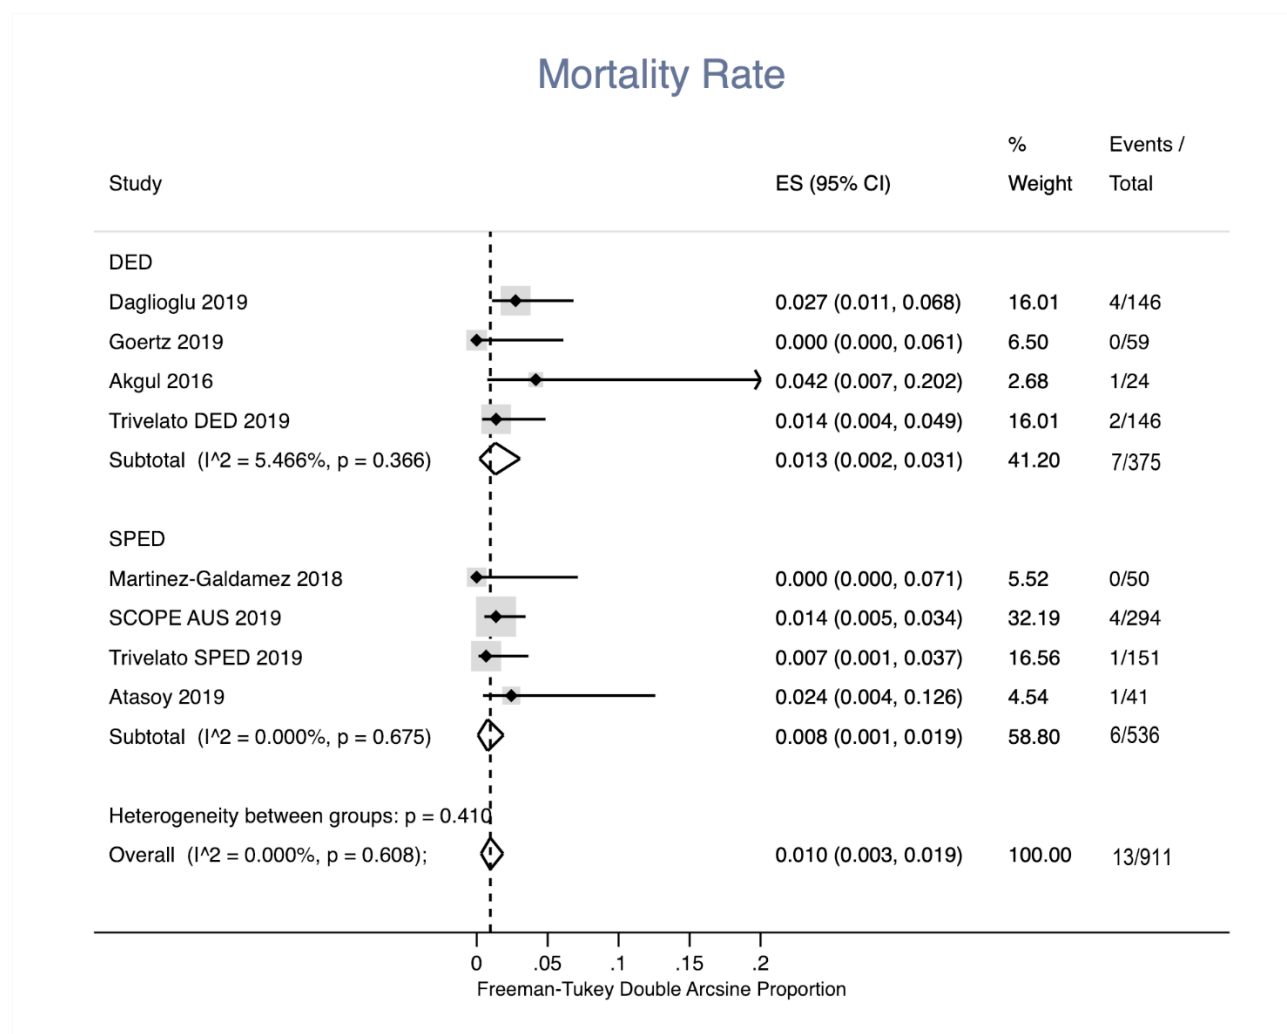

## Safety outcome 2: Morbidity Rate

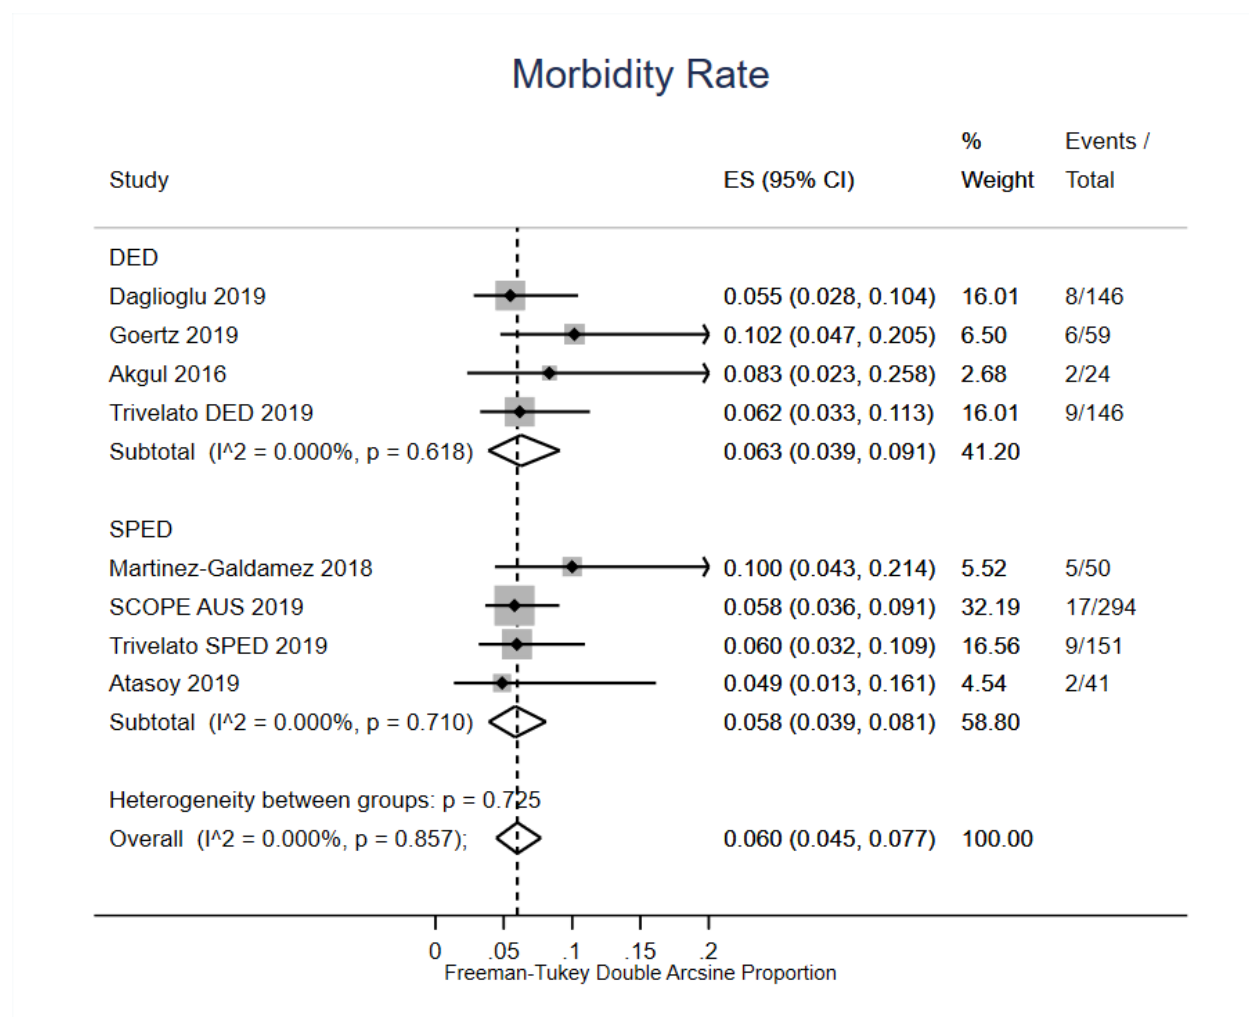

### Safety outcome 3: Total Ischaemia Rate

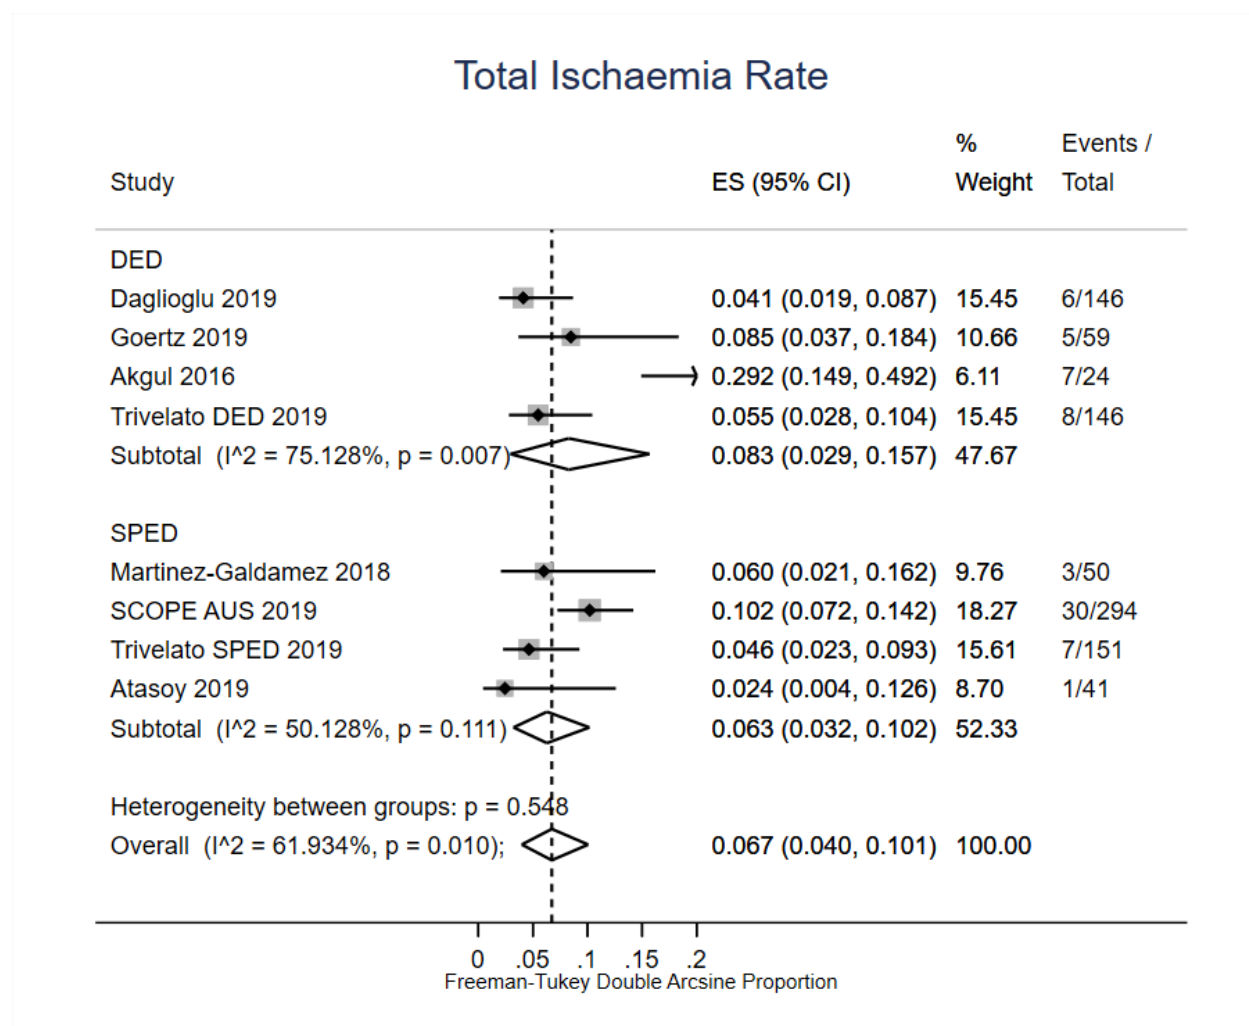

## Safety outcome 4: Serious Ischaemia Rate

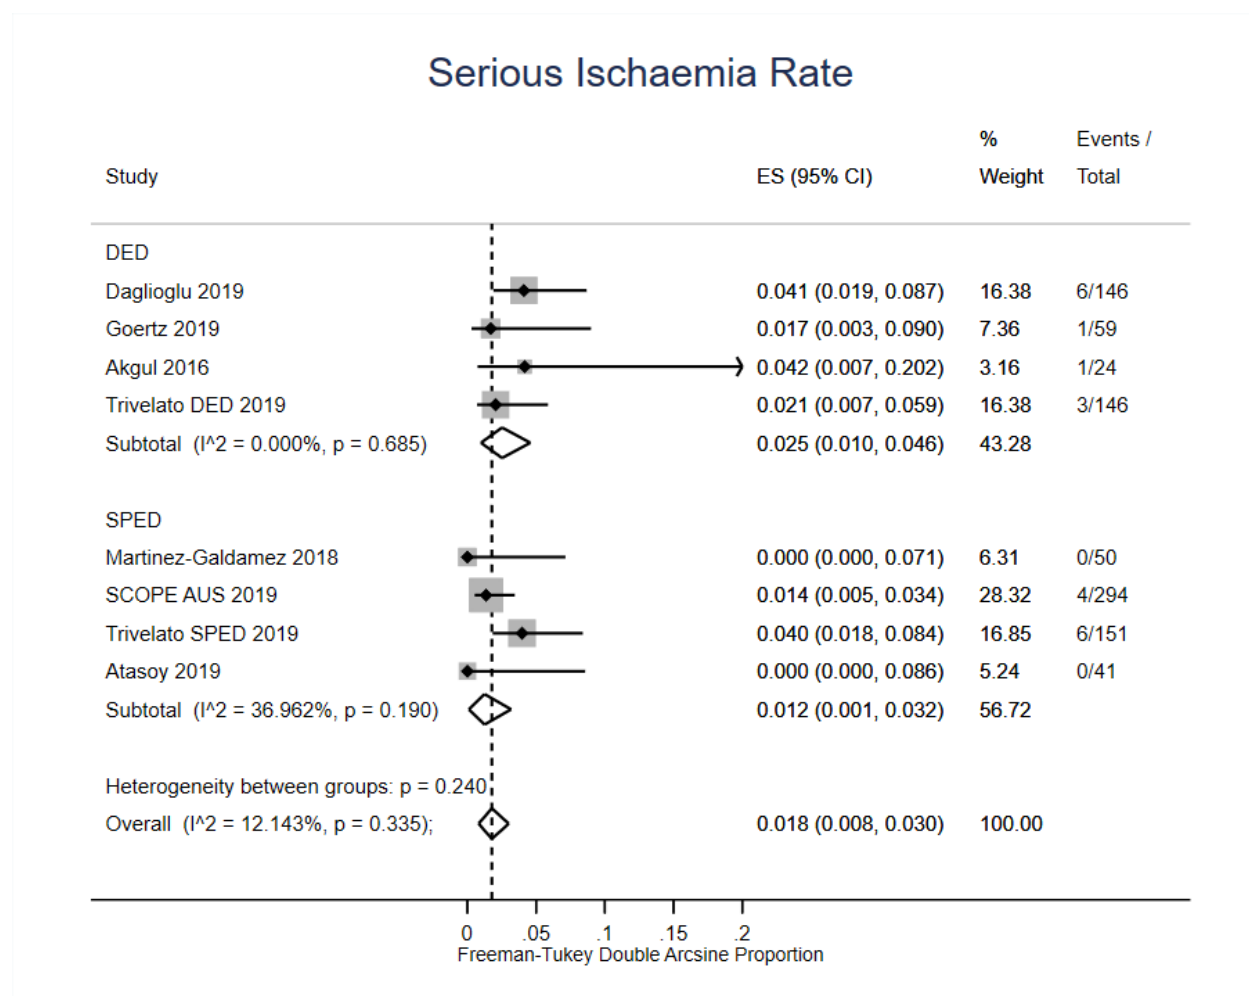

Supplement: 1110.pdf [file 1110.pdf]
